March 2013

# PSYCHIATRIC SERVICES

A Journal of the  
American Psychiatric  
Association

- ◆ Interventions to Enhance Treatment Engagement of Underserved Groups
- ◆ Antipsychotic Use by Children and Adults: Three New Studies
- ◆ Outcome or Process? Avoiding a Dualistic Approach to Recovery
- ◆ Internalized Stigma: A Model of Its Negative Effects and Outcomes

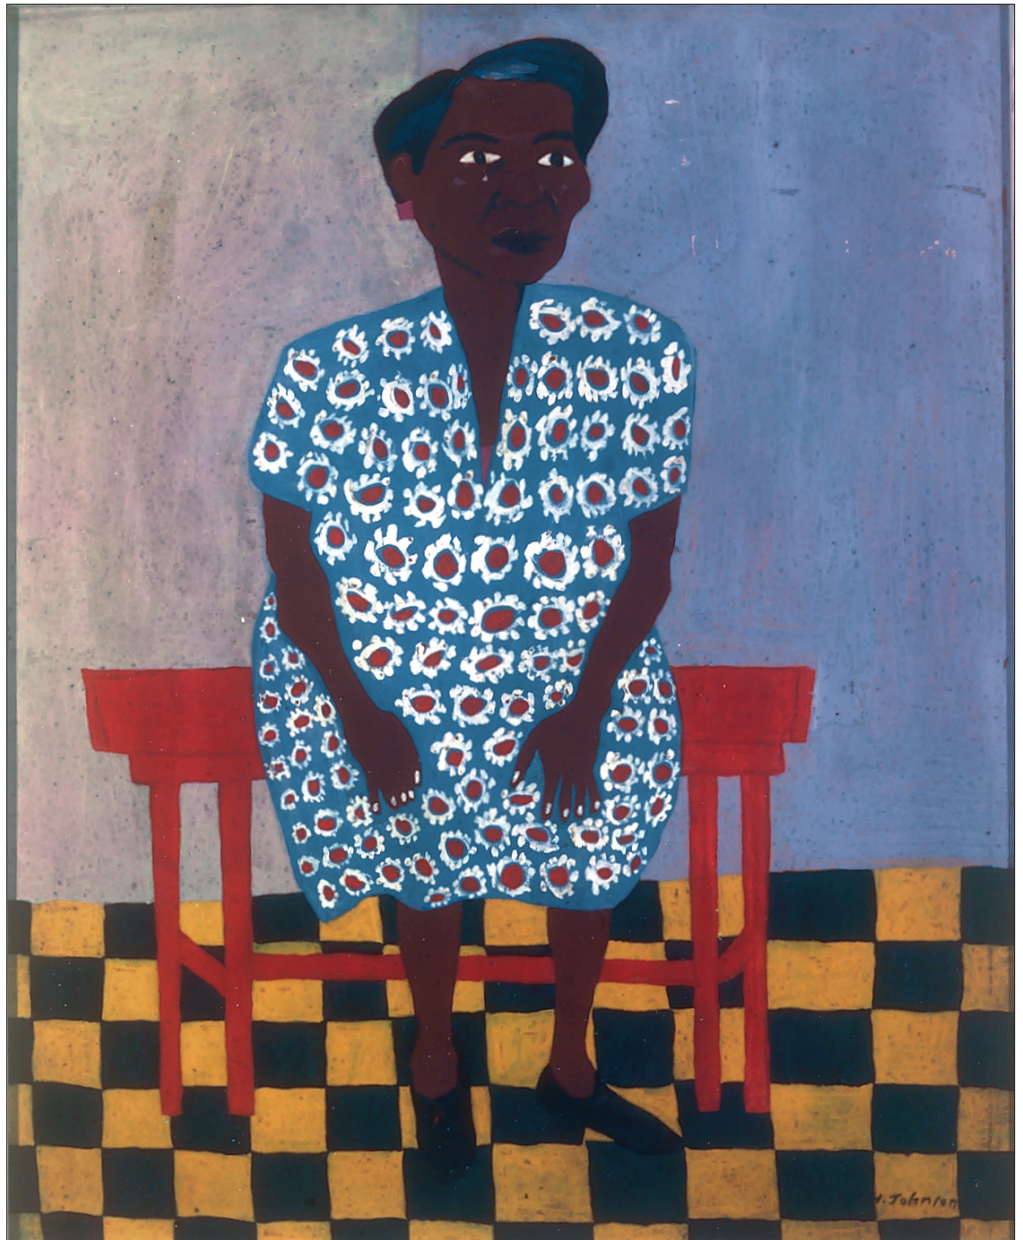

Source: http://ps.psychiatryonline.org/doi/suppl/10.1176/ps.2013.64.issue-3/suppl_file/cover.pdf
